# Supplementary material
Source: MDPI journal article supplement (https://www.mdpi.com/search?q=catalysts-09-00847)
Supplement: s001 [file catalysts-09-00847-s001.pdf]

Supporting Information

# Oxidized Palladium Supported on Ceria Nanorods for Catalytic Aerobic Oxidation of Benzyl Alcohol to Benzaldehyde in Protic Solvents

Seyed Sepehr Moeini <sup>1,\*</sup>, Chiara Battocchio <sup>1</sup>, Stefano Casciardi <sup>2</sup>, Igor Luisetto <sup>3,\*</sup>, Paolo Lupattelli <sup>4</sup>, Daniela Tofani <sup>1</sup> and Simonetta Tuti <sup>1</sup>

<sup>1</sup> Department of Science, “Roma Tre” University, Rome 00146, Italy; chiara.battocchio@uniroma3.it (C.B.); daniela.tofani@uniroma3.it (D.T.); simonetta.tuti@uniroma3.it (S.T.)

<sup>2</sup> Department of Occupational and Environmental Medicine, Epidemiology and Hygiene, INAIL Research, Monte Porzio Catone, 00078 Rome, Italy; s.casciardi@inail.it

<sup>3</sup> Department of Energy Technologies, Italian National Agency for New Technologies, Energy and Sustainable Economic Development (ENEA), 00123 Rome, Italy

<sup>4</sup> Department of Science, University of Basilicata, Potenza 85100, Italy; paolo.lupattelli@unibas.it

\* Correspondence: seyedsepehr.moeini@uniroma3.it (S.S.M.); igor.luisetto@enea.it (I.L.)

## XPS analysis of used PdO<sub>x</sub>/CeO<sub>2</sub>-NR

XPS measurements of used PdO<sub>x</sub>/CeO<sub>2</sub>-NR was performed measuring the core level spectra, using a VG Escalab MKII, equipped with a twin anode Al/Mg X-ray source (IPSE Laboratory of DTE, ENEA Casaccia, Rome, Italy). The used catalyst was previously tested in BnOH oxidation for 5 hours (conditions: 0.16 mmol BnOH, 32 mg catalyst, 20 ml/min air flow, using ethanol as solvent at boiling point, under reflux). After the reaction, the catalyst was separated by centrifuge (10000 rpm, 20 min), washed 3 times with ethanol, and dried at room temperature. The fresh PdO<sub>x</sub>/CeO<sub>2</sub>-NR was also studied using abovementioned XPS facility. The calculated PdO and PdO<sub>x</sub> percentages for fresh PdO<sub>x</sub>/CeO<sub>2</sub>-NR (Table S1), is comparable with those reported in Table 2.

**Table S1.** Binding Energy, Full Width Half Maximum and atomic percent values of Pd3d5/2 components for the fresh and used PdO<sub>x</sub>/CeO<sub>2</sub>-NR samples.

| Sample                                      | BE (eV) | FWHM (eV) | Assignment             | Atomic % |
|---------------------------------------------|---------|-----------|------------------------|----------|
| PdO <sub>x</sub> /CeO <sub>2</sub> -NR      | 335.79  | 2.51      | PdO                    | 20.1     |
|                                             | 337.76  | 2.51      | PdO <sub>x</sub> (x>1) | 79.9     |
| Used PdO <sub>x</sub> /CeO <sub>2</sub> -NR | 335.82  | 2.57      | PdO                    | 42.7     |
|                                             | 337.77  | 2.57      | PdO <sub>x</sub> (x>1) | 57.3     |

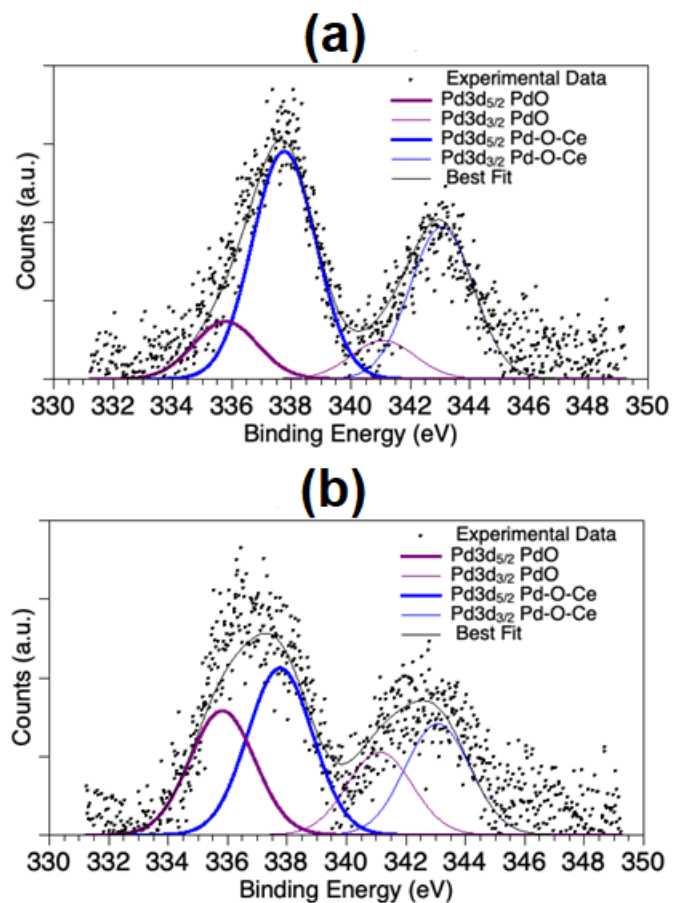

**Figure S1.** XPS spectra of Pd 3d region for (a) fresh PdO<sub>x</sub>/CeO<sub>2</sub>-NR, and (b) used PdO<sub>x</sub>/CeO<sub>2</sub>-NR. BnOH oxidation conditions: 0.16 mmol BnOH, 32 mg catalyst, 20 ml/min air flow, using ethanol as solvent at boiling point, under reflux.
